# Supplementary material
Source: HighWire-hosted journal article supplement (https://www.cmajopen.ca/highwire/filestream/87065/field_highwire_adjunct_files/0/2015-0029-1-at.pdf)
Supplement: 2015-0029-1-at.pdf [file 2015-0029-1-at.pdf]

## Appendix 1 (as supplied by the authors): Vaccine and Medication List

Vaccine List, Schedule 2 – Reg 275/94 of the Nursing Act, 1991

|                                                                                                                                                                                                                                                                                                                                                                                                                                                                                                                                 |
|---------------------------------------------------------------------------------------------------------------------------------------------------------------------------------------------------------------------------------------------------------------------------------------------------------------------------------------------------------------------------------------------------------------------------------------------------------------------------------------------------------------------------------|
| SCHEDULE 2<br>Diphtheria vaccines – single entity or combination drugs<br>Haemophilus b vaccine<br>Hepatitis A vaccine<br>Hepatitis B immune globulin<br>Hepatitis B vaccine<br>Influenza vaccine<br>Measles vaccines – single entity or combination drugs<br>Meningococcal vaccine<br>Mumps vaccine<br>Pertussis vaccine<br>Pneumococcal vaccine<br>Poliomyelitis vaccine<br>Rh (D) immune globulin<br>Rubella vaccine<br>Tetanus vaccine – single entity or combination drugs<br>Tetanus immune globulin<br>Varicella vaccine |
|---------------------------------------------------------------------------------------------------------------------------------------------------------------------------------------------------------------------------------------------------------------------------------------------------------------------------------------------------------------------------------------------------------------------------------------------------------------------------------------------------------------------------------|

Source:

e-Laws. (2015). Ontario regulation 275/94 of the Nursing Act, 1991. Toronto: Government of Ontario. Retrieved from, <http://www.ontario.ca/laws/regulation/940275/v13#BK21>

Health Professions Regulatory Advisory Council (HPRAC). (2007, November). *A jurisdictional review. Scope of practice for registered nurses in the extended class (nurse practitioners)*. Appendix A- Canada: Legislation and policy. Toronto: Government of Ontario. Retrieved from: <http://www.hprac.org/en/projects/resources/hprac-APPENDIXA-newcoverandindex.nov0507.pdf>

Medication List – Schedule 3, Effective July 30, 2007 to September 30, 2011 Reg 275/94 of the Nursing Act, 1991

| A - E                                                                                | E-M                                                                  | M-Z                                                      |
|--------------------------------------------------------------------------------------|----------------------------------------------------------------------|----------------------------------------------------------|
| Acarbose – for renewal only                                                          | Ethinyl estradiol and ethynodio diacetate                            | Misoprostol                                              |
| Acebutolol – for renewal only                                                        | Ethinyl/etonogestrel (vaginal ring)                                  | Mometasone furoate                                       |
| Acetic acid/benzethonium chloride/hydrocortisone compound                            | Ethinyl estradiol and levonorgestrel                                 | Mometasone furoate monohydrate                           |
| Acyclovir (oral)                                                                     | Ethinyl estradiol and norethindrone                                  | Montelukast sodium- for renewal only                     |
| Acyclovir (topical preparation)                                                      | Ethinyl estradiol and norethindrone acetate                          | Moxifloxacin                                             |
| Alendronate sodium – for renewal only                                                | Ethinyl estradiol and norgestrel                                     | Mupirocin                                                |
| Allopurinol – for renewal only                                                       | Etidronate disodium/calcium carbonate – for renewal only             | Nadolol – for renewal only                               |
| Amantadine hydrochloride                                                             | Famciclovir                                                          | Naproxen                                                 |
| Amitriptyline – for renewal only                                                     | Fluconazole (oral ) – for vulvovaginal candidiasis only              | Naproxen sodium                                          |
| Amlodipine besylate – for renewal only                                               | Flunisolide                                                          | Naratriptan – for renewal only                           |
| Amoxicillin                                                                          | Fluocinolone acetonide                                               | Nicotine patch                                           |
| Amoxicillin and clavulanate                                                          | Flumethasone pivalate/cloiquinol compound                            | Nifedipine – for renewal only                            |
| Aqueous procaine penicillin G – for purpose of treating sexually transmitted disease | Fluoxetine – for renewal only                                        | Nitrofurantoin                                           |
| Atenolol – for renewal only                                                          | Fluticasone propionate (inhalation) – for renewal only               | Nitroglycerin SL or spray – in an emergency              |
| Azithromycin                                                                         | Fluticasone propionate (nasal)                                       | Norelgestromin and ethinyl estradiol (transdermal patch) |
| Beclomethasone dipropionate (inhalation) – for renewal only                          | Fluvastatin – for renewal only                                       | Norethindrone                                            |
| Benzoyl peroxide                                                                     | Fluvoxamine – for renewal only                                       | Norethindrone acetate/ethinyl estradiol                  |
| Betamethasone sodium phosphate and gentamicin sulfate otic solution                  | Folic acid                                                           | Nortriptyline – for renewal only                         |
| Bethamethasone valerate                                                              | Formoterol fumarate dehydrate – for renewal only                     | Nystatin (oral)                                          |
| Candesartan cilexetil- for renewal only                                              | Fosinopril sodium- for renewal only                                  | Ofloxacin                                                |
| Captopril – for renewal only                                                         | Framycetin sulphate                                                  | Olopatadine HLC                                          |
| Carbamazepine – for renewal only                                                     | Framycetin sulphate /gramicidin/dexamethasone compound otic solution | Omeprazole – for renewal only                            |
| Cefixime – for the purpose of treating sexually transmitted diseases                 | Furosemide – for renewal only                                        | Oseltamivir phosphate                                    |
| Cefprozil                                                                            | Fusidic acid (topical preparation)                                   | Pantoprazole (oral) – for renewal only                   |
| Ceftriaxone sodium – for the purpose of treating sexually transmitted diseases       | Fusidic acid 1% viscous eye drops                                    | Paroxetine – for renewal only                            |
| Cefuroxime axetil (oral)                                                             | Gabapentin – for renewal only                                        | Penicillin V                                             |
| Celecoxib – for renewal only                                                         | Gentamycin sulphate (otic, ophthalmic and topical)                   | Perindopril erbumine – for renewal only                  |
| Cephalexin                                                                           | Gliclazide – for renewal only                                        | Phenazopyridine HCl                                      |
| Cilzazpril – for renewal only                                                        | Glyburide – for renewal only                                         | Phenytoin – for renewal only                             |
| Ciprofloxacin extended release                                                       | Haloperidol – for chronic nausea in palliation                       | Pindolol - for renewal only                              |
| Ciprofloxacin HCl                                                                    | Hydrochlorothiazide – for renewal only                               | Pioglitazone – for renewal only                          |
| Ciprofloxacin HC (otic)                                                              | Hydrochlorothiazide/amiloride – for renewal only                     | Pivampicillin                                            |
| Citalopram – for renewal only                                                        | Hydrochlorothiazide/candesartan – for renewal only                   | Podophyllum resin                                        |
| Clarithromycin (oral)                                                                | Hydrochlorothiazide/cilazapril – for renewal only                    | PPD-B (Mantoux)                                          |
| Clindamycin (oral)                                                                   | Hydrochlorothiazide/enalapril – for renewal only                     | Pravastatin – for renewal only                           |
| Clindamycin (topical preparation)                                                    | Hydrochlorothiazide/eprosartan – for renewal only                    | PregVit                                                  |
| Clindamycin phosphate (vaginal cream)                                                | Hydrochlorothiazide/irbesartan – for renewal only                    | Progesterone                                             |
| Clopidogrel bisulfate – for renewal only                                             | Hydrochlorothiazide/lisinopril– for renewal only                     | Propranolol – for renewal only                           |
| Cloxacillin (oral preparation)                                                       | Hydrochlorothiazide/losartan – for renewal only                      | Quinapril – for renewal only                             |

|                                                                          |                                                                                    |                                                                                                    |
|--------------------------------------------------------------------------|------------------------------------------------------------------------------------|----------------------------------------------------------------------------------------------------|
| Collagenase                                                              | Hydrochlorothiazide/pindolol – for renewal only                                    | Rabeprazole – for renewal only                                                                     |
| Condylline                                                               | Hydrochlorothiazide/quinapril – for renewal only                                   | Raloxifene HCl – for renewal only                                                                  |
| Conjugated Estrogens                                                     | Hydrochlorothiazide/spironolactone – for renewal only                              | Ramipril – for renewal only                                                                        |
| Conjugated Estrogens and medroxyprogesterone acetate                     | Hydrochlorothiazide/telmisartan– for renewal only                                  | Ranitidine HCl (oral)                                                                              |
| Cyanocobalamin (Vitamin B12)                                             | Hydrochlorothiazide/triamterene – for renewal only                                 | Risedronate sodium hemi-pentahydrate – for renewal only                                            |
| Desogestrel and ethinyl estradiol                                        | Hydrochlorothiazide/valsartan – for renewal only                                   | Rizatriptan – for renewal only                                                                     |
| Dextrose 50 per cent (injectable preparation) – in an emergency          | Hydrocortisone (topical preparation)                                               | Rosiglitazone – for renewal only                                                                   |
| Diazepam (injectable preparation) - in an emergency                      | Hydroxyzine hydrochloride (oral preparation)                                       | Rosuvastatin – for renewal only                                                                    |
| Diclofenac sodium and misoprostol                                        | Ibuprofen                                                                          | Salbutamol (inhaler or nebulizer solution) - in an emergency, for renewal or for use in spirometry |
| Dienestrol                                                               | Irbesartan – for renewal only                                                      | Salmeterol xinafoate – for renewal only                                                            |
| Diltiazem – for renewal only                                             | Imiquimod                                                                          | Salmeterol xinafoate/fluticasone propionate – for renewal only                                     |
| Diphenhydramine hydrochloride (injectable preparation) – in an emergency | Ipratropium bromide – for renewal only                                             | Sertraline – for renewal only                                                                      |
| Doxycycline hyclate                                                      | Ipratropium bromide (inhaler or nebulizer solution) – in an emergency              | Silver sulfadiazine                                                                                |
| Doxylamine succinate and pyridoxine hydrochloride                        | Ipratropium bromide/salbutamol sulfate – for renewal only                          | Simvastatin – for renewal only                                                                     |
| Econazole                                                                | Ketoconazole (topical)                                                             | Telmisartan – for renewal only                                                                     |
| Enalapril maleate – for renewal only                                     | Labetalol – for renewal only                                                       | Terbutaline sulfate – for renewal only                                                             |
| Epinephrine                                                              | Lansoprazole – for renewal only                                                    | Terconazole                                                                                        |
| Epinephrine hydrochloride (injectable preparation) – in an emergency     | Levocabastine HCL                                                                  | Terbinafine (topical use; or oral use for the treatment of onychomycosis only)                     |
| Eprosartan mesylate – for renewal only                                   | Levofloxacin                                                                       | Tetracycline hydrochloride (oral preparation)                                                      |
| Erythromycin and benzoyl peroxide                                        | Levonorgestrel                                                                     | Timolol - for renewal only                                                                         |
| Erythromycin and tretinoin                                               | Levonorgestrel releasing intrauterine system                                       | Tiotropium bromide monohydrate – for renewal only                                                  |
| Erythromycin base                                                        | Levothyroxine sodium – for renewal only                                            | Tobramycin 0.3% ophthalmic solution                                                                |
| Erythromycin estolate                                                    | Lidocaine hydrochloride 1% and 2%, with or without epinephrine (local anaesthetic) | Topiramate – for renewal                                                                           |
| Erythromycin ethylsuccinate                                              | Lisinopril – for renewal only                                                      | Trandolapril – for renewal                                                                         |
| Erythromycin ethylsuccinate/sulfisozazole acetyl                         | Lorazepam (injectable preparation, oral and sublingual) – in an emergency          | Tretinoin (topical)                                                                                |
| Erythromycin stearate                                                    | Losartan potassium – for renewal only                                              | Triamcinolone acetonide                                                                            |
| Erythromycin with ethyl alcohol lotion                                   | Lovastatin – for renewal only                                                      | Trichloroacetic acid 50-80%, Bichloroacetic acid 50-80%                                            |
| Escitalopram – for renewal only                                          | Mebendazole                                                                        | Trimethoprim                                                                                       |
| Estradiol-17 beta (micronized)                                           | Medroxyprogesterone acetate (injectable preparation and oral)                      | Trimethoprim and sulfamethoxazole (oral preparation)                                               |
| Estradiol-17 beta (transdermal)                                          | Mefenamic acid                                                                     | Valacyclovir hydrochloride                                                                         |
| Estradiol-17 beta (Silastic ring)                                        | Meloxicam – for renewal only                                                       | Valproic acid – for renewal only                                                                   |
| Estropipate (piperazine estrone sulfate)                                 | Mestranol and norethindrone                                                        | Valsartan – for renewal only                                                                       |
| Estradiol-17 beta hemihydrate                                            | Metformin hydrochloride – for renewal only                                         | Venlafaxine – for renewal only                                                                     |
| Estradiol-17 beta norethindrone acetate                                  | Metoprolol - for renewal only                                                      | Verapamil extended release – for renewal only                                                      |
| Estrone (cone or cream)                                                  | Metronidazole (oral and topical preparations)                                      | Zafirlukast – for renewal only                                                                     |
| Ethinyl estradiol and cyproterone acetate                                | Minocycline hydrochloride                                                          | Zanamivir                                                                                          |
| Ethinyl estradiol/drospirenone                                           | Mirtazapine – for renewal only                                                     | Zolmitriptan – for renewal only                                                                    |

Source:

e-Laws. (2015). Ontario regulation 275/94 of the Nursing Act, 1991. Toronto: Government of Ontario. Retrieved from, <http://www.ontario.ca/laws/regulation/940275/v13#BK21>

Health Professions Regulatory Advisory Council (HPRAC). (2007, November). *A jurisdictional review. Scope of practice for registered nurses in the extended class (nurse practitioners)*. Appendix A- Canada: Legislation and policy. Toronto: Government of Ontario. Retrieved from, <http://www.hprac.org/en/projects/resources/hprac-APPENDIXA-newcoverandindex.nov0507.pdf>

**Amendment to Nursing Act of 1991 and Regulation 275/94: December 2009**

Bill 179 passed the Ontario Legislative Assembly on December 15, 2009. Among the changes in regulation was the ability of nurse practitioners in Ontario to “broadly prescribe drugs appropriate for client care” rather than prescribing from a list of approved medications (CNO, 2014). The ability to prescribe broadly went into effect and was implemented on October 1, 2011. The previous Schedules 2 and 3 were eliminated from the regulations.

See:

College of Nurses of Ontario [CNO]. (2014). FAQ Bill 179. Toronto: CNO. Retrieved from, <http://www.cno.org/what-is-cno/regulation-and-legislation/legislation-governing-nursing/faq-bill-179/>

Regulated Health Professions Statute Law Amendment Act, 2009, S.O. 2009, c. 26 - Bill 179 <http://www.ontario.ca/laws/statute/s09026>
